# Supplementary material for: Polymer–silica hybrid self-healing nano/microcapsules with enhanced thermal and mechanical stability
Source: Royal Society of Chemistry journal article supplement (doi:10.1039/c8ra08396g), 2019-01-01
Supplement: c8ra08396g1.pdf [file c8ra08396g1.pdf]

**Supporting Information**  
**Polymer-silica hybrid self-healing**  
**nano/microcapsules with enhanced thermal and**  
**mechanical stability**

*Xin Zhou, Weiping Li,\* Liqun Zhu, Hui Ye, and Huicong Liu\**

No. 37 Xueyuan Road, Beijing 1000191, P. R. China

Corresponding author: Huicong Liu, Weiping Li

Address: Beihang University

No. 37 Xueyuan Road, Beijing 1000191, P. R. China

Email: liuhc@buaa.edu.cn (Huicong Liu)

liweiping@buaa.edu.cn (Weiping Li),

Fax: +86-10-8231-7113

Phone: +86-10-8231-7113

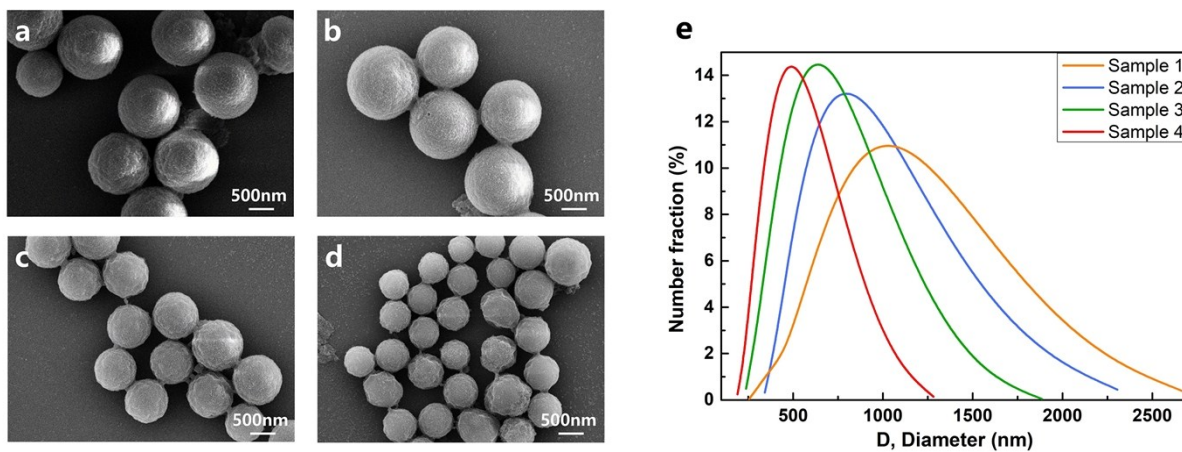

**Figure S1.** SEM images (a, b, c, d) and capsule size distributions (e) of Sample 1, 2, 3, 4 with different agitation rates.

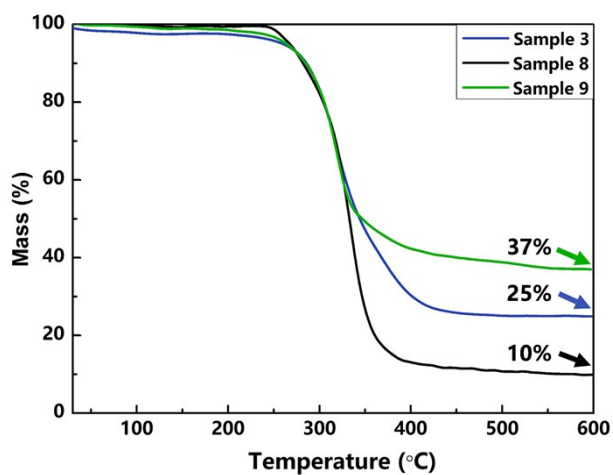

**Figure S2.** TGA curves of the capsule samples (Sample 3, Sample 8, Sample 9).

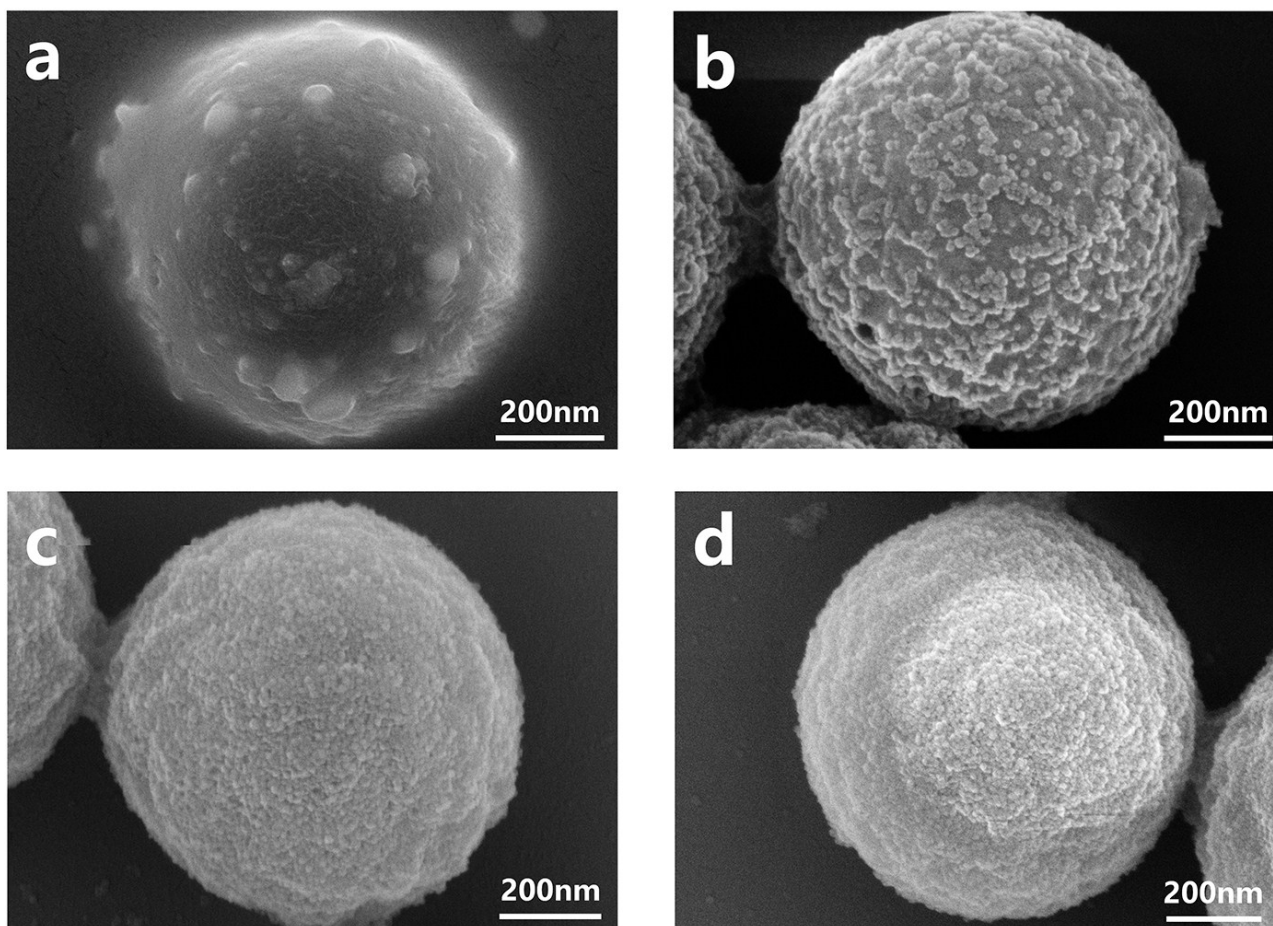

**Figure S3.** SEM images (a, b, c, d) of the capsule samples (blank sample, sample 3, sample 8, sample 9).

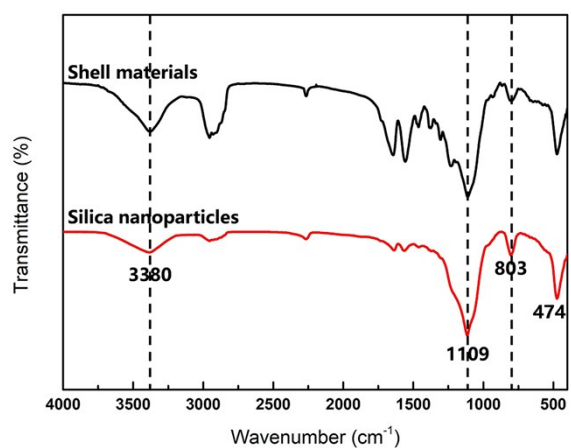

**Figure S4.** FT-IR spectra of silica nanoparticles and the shell materials.

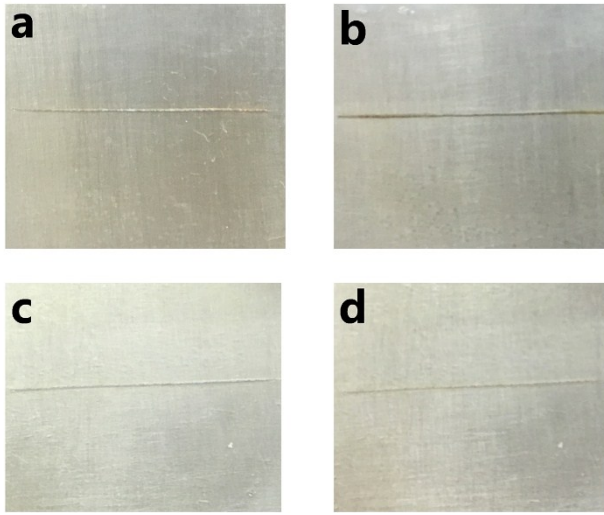

**Figure S5.** The optical images of the pure resin coating and the self-healing coating before (a, c) and after (b, d) the brine-submersion corrosion-accelerating test.
